# Supplementary material
Source: PubMed Central journal article supplement (PMC9588727)
Supplement: NIHMS1832754-supplement-1.pdf [file NIHMS1832754-supplement-1.pdf]

Supplementary Figure 1

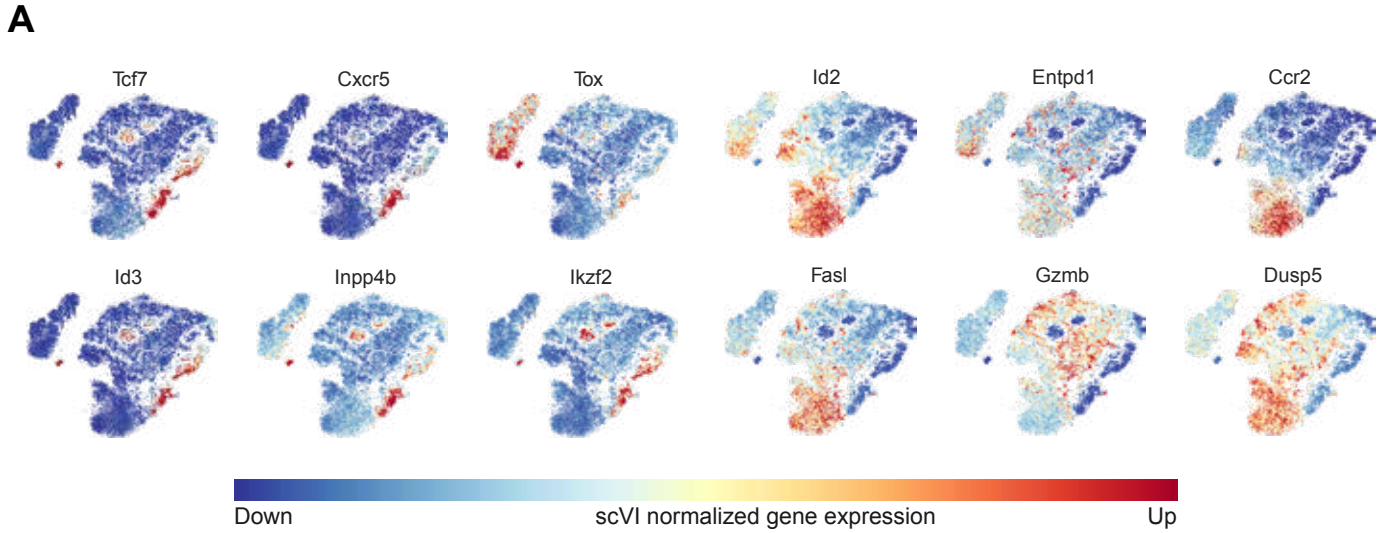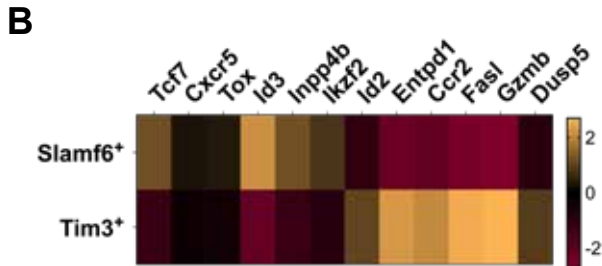

**LCMV-MN induced Slamf6<sup>+</sup>/Tim3<sup>-</sup> CD8 T cells transcriptionally resemble T<sub>pex</sub>.** (A) Relative scVI normalized gene expression for d7 T<sub>pex</sub> defining genes overlaid onto tSNE plots defined in figure 7D analysis. A red (Up) value indicates high expression whereas a blue (Down) value indicates low to no expression of a gene in the cell. (B) heatmap depicting genes shown in (B) and their relative expression in d30 pi LCMV-MN Slamf6<sup>+</sup> vs Tim3<sup>+</sup> cells.

**Supplementary Table-1: LCMV strains used for amino acid comparison**

| Protein Segment          | Strain      | GenBank ID | Protein ID                 |
|--------------------------|-------------|------------|----------------------------|
| Segment S (glycoprotein) |             |            |                            |
|                          | LCMV-CI13   | DQ361065.2 | <a href="#">ABC96001.2</a> |
|                          | LCMV-Arm    | AY847350.1 | <a href="#">AAX49341.1</a> |
|                          | LCMV-DOCILE | EU480452.1 | <a href="#">ACA61301.1</a> |
|                          | LCMV-WE     | AJ297484.1 | <a href="#">CAC01231.1</a> |
|                          | LCMV-Traub  | DQ868487.1 | <a href="#">ABI96826.1</a> |
| Segment L (polymerase)   |             |            |                            |
|                          | LCMV-CI13   | DQ361066.1 | <a href="#">ABC96004.1</a> |
|                          | LCMV-Arm    | AY847351.1 | <a href="#">AAX49344.1</a> |
|                          | LCMV-DOCILE | EU480453.1 | <a href="#">ACA61304.1</a> |
|                          | LCMV-WE     | FJ607025.1 | <a href="#">CV72589.1</a>  |
|                          | LCMV-Traub  | DQ868488.1 | <a href="#">ABI96829.1</a> |
| Nucleoprotein            |             |            |                            |
|                          | LCMV-CI13   | DQ361065.2 | <a href="#">ABC96002.1</a> |
|                          | LCMV-Arm    | AY847350.1 | <a href="#">AAX49342.1</a> |
|                          | LCMV-DOCILE | EU480452.1 | <a href="#">ACA61302.1</a> |
|                          | LCMV-WE     | AJ297484.1 | <a href="#">ACV72571.1</a> |
|                          | LCMV-Traub  | DQ868487.1 | <a href="#">ABI96827.1</a> |
| Z-protein                |             |            |                            |
|                          | LCMV-CI13   | DQ361066.1 | <a href="#">ABC96003.1</a> |
|                          | LCMV-Arm    | AY847351.1 | <a href="#">AAX49343.1</a> |
|                          | LCMV-DOCILE | EU480453.1 | <a href="#">ACA61303.1</a> |
|                          | LCMV-WE     | FJ607025.1 | <a href="#">ACV72590.1</a> |
|                          | LCMV-Traub  | DQ868488.1 | <a href="#">ABI96828.1</a> |

**Supplementary Table-1:** List of LCMV strains for which complete is available in the NCBI database. The amino acid sequence information was used to compare with that of LCMV-MN to establish sequence homology in figure 1D. The relevant Genbank ID and protein ID are shown.
